# Supplementary material
Source: publisher site journal article supplement (https://www.spandidos-publications.com/664/downloadSupplementary)

Figure S1. Determination of median lethal dose ( $LD_{50}$ ) of fentanyl in 293-cells (magnification, x10). (A) 293-OATP1A2 cells without fentanyl. (B) When the concentration of fentanyl was  $150 \mu\text{M}$ , ~50% of cells were killed.

**A**

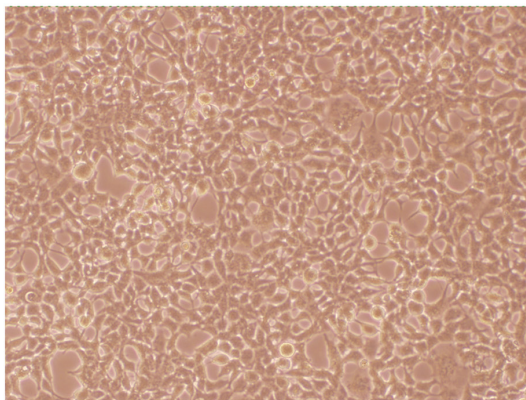

**B**

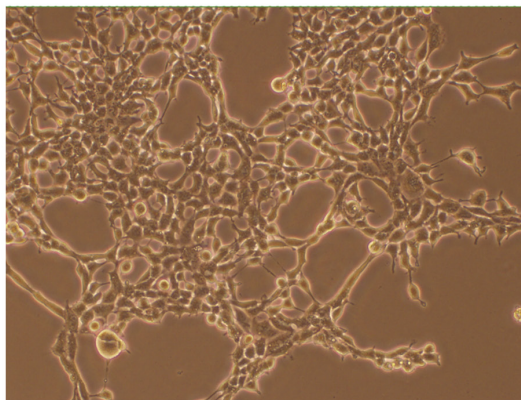

Supplement: Supplementary file 1 [file downloadSupplementary]
